# Supplementary material
Source: PubMed Central journal article supplement (PMC9350074)

# One-year follow-up CT findings in COVID-19 patients

## A systematic review and meta-analysis

### Mid-term Follow-up

The proportion of patients with any residual CT abnormalities

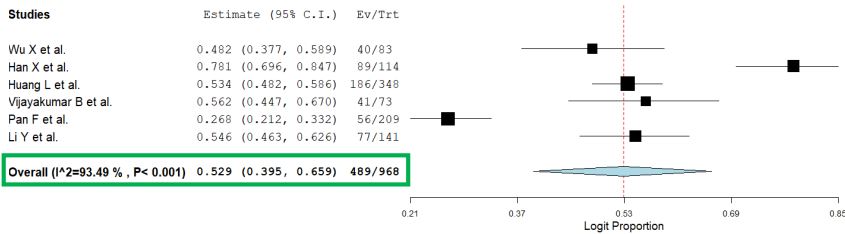

### Residual abnormal CT findings

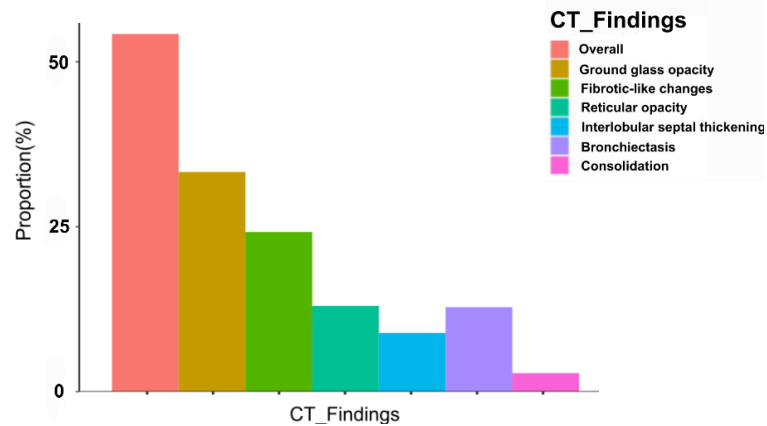

### Summary points

**Fifteen observational studies with 3,134 hospitalized COVID-19 patients were included.**

\*

**Residual CT abnormalities were common even 1-year after COVID-19.**

\*

**Gradual recovery from mid-term (4-7 months) to 1-year follow-up was observed on CT.**

\*

**Fibrotic changes may take longer to resolve, especially in patients with severe or critical COVID-19.**

### 1-year Follow-up

The proportion of patients with any residual CT abnormalities

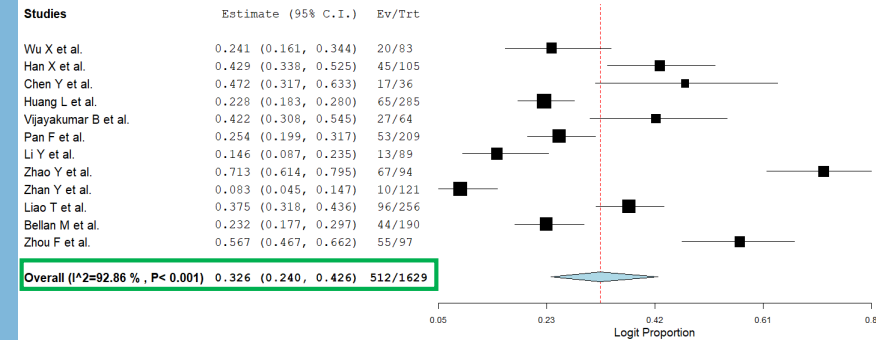

### Residual abnormal CT findings

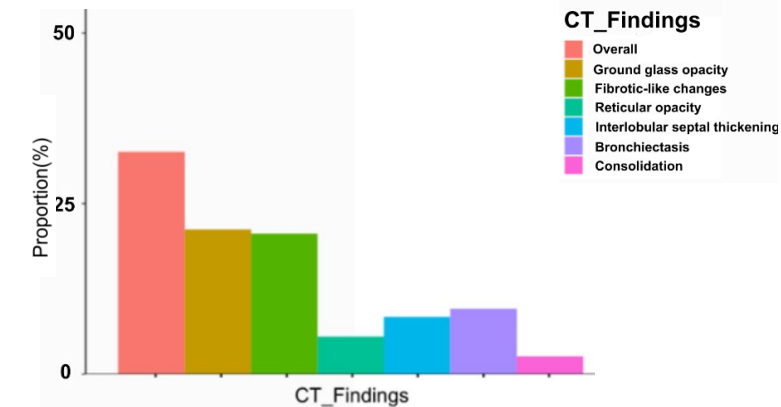

Supplement: RESP-27-605-s002.pdf [file RESP-27-605-s002.pdf]
